# Supplementary material
Source: HighWire-hosted journal article supplement (https://bmjopen.bmj.com/content/15/5/e094887)
Supplement: inline-supplementary-material-1 [file inline-supplementary-material-1.pdf]

Supplementary

s-Table 1. Binomial logistic regression analysis of factors associated with MAKE-30 in COVID-19 vs non-COVID-19 groups

| Characteristic              | COVID-ARDS          |             |         |                       |           |         | Non-COVID-19 ARDS   |             |         |                       |           |         |
|-----------------------------|---------------------|-------------|---------|-----------------------|-----------|---------|---------------------|-------------|---------|-----------------------|-----------|---------|
|                             | Univariate Analysis |             |         | Multivariate analysis |           |         | Univariate Analysis |             |         | Multivariate analysis |           |         |
|                             | OR                  | 95% CI      | p-value | OR                    | 95% CI    | p-value | OR                  | 95% CI      | p-value | OR                    | 95% CI    | p-value |
| Age                         | 1.04                | 1.02–1.05   | <0.001* | 1.03                  | 1.01–1.05 | 0.004   | 0.99                | 0.98–1.01   | 0.48    |                       |           |         |
| Male                        | 1.59                | 1.05–2.42   | 0.027*  | 1.50                  | 0.92–2.49 | 0.107   | 0.89                | 0.53–1.50   | 0.67    |                       |           |         |
| BMI                         | 1                   | 0.97–1.02   | 0.87    |                       |           |         | 1.01                | 0.97–1.05   | 0.65    |                       |           |         |
| Ethnicity                   |                     |             | 0.01*   |                       |           |         |                     |             | 0.22    |                       |           |         |
| White                       | —                   | —           |         | —                     | —         |         | —                   | —           |         |                       |           |         |
| Asian / Asian British       | 0.80                | 0.50–1.25   |         | 0.80                  | 0.46–1.37 | 0.425   | 1.69                | 0.82–3.67   |         |                       |           |         |
| Black / African / Caribbean | 2.13                | 1.00–4.67   |         | 0.97                  | 0.37–2.52 | 0.947   | 2.54                | 0.86–9.27   |         |                       |           |         |
| Other                       | 0.57                | 0.33–0.95   |         | 0.44                  | 0.23–0.82 | 0.011   | 1.3                 | 0.31–6.49   |         |                       |           |         |
| Hypertension                | 2.11                | 1.42–3.15   | <0.001* | 1.20                  | 0.72–2.00 | 0.477   | 1.15                | 0.65–2.07   | 0.63    |                       |           |         |
| Diabetes mellitus           | 1.68                | 1.13–2.50   | 0.011*  | 1.74                  | 1.05–2.88 | 0.030   | 0.98                | 0.52–1.87   | 0.95    |                       |           |         |
| Obesity                     | 0.79                | 0.54–1.15   | 0.22    |                       |           |         | 1.51                | 0.88–2.66   | 0.14    |                       |           |         |
| Asthma                      | 0.79                | 0.44–1.38   | 0.41    |                       |           |         | 0.84                | 0.32–2.27   | 0.72    |                       |           |         |
| Ischemic heart disease      | 2.07                | 1.07–4.05   | 0.031*  | 0.89                  | 0.38–2.02 | 0.779   | 1.08                | 0.53–2.26   | 0.84    |                       |           |         |
| Cancer                      | 0.89                | 0.33–2.22   | 0.81    |                       |           |         | 1.84                | 0.95–3.73   | 0.073   |                       |           |         |
| eGFR                        | 0.95                | 0.94–0.96   | <0.001* | 0.95                  | 0.94–0.97 | <0.001  | 0.97                | 0.96–0.98   | <0.001* | 0.97                  | 0.96–0.68 | <0.001  |
| White cell count            | 1.01                | 0.99–1.03   | 0.43    |                       |           |         | 0.97                | 0.94–1.00   | 0.029*  | 0.98                  | 0.95–1.01 | 0.194   |
| Neutrophils                 | 1.03                | 1.00–1.07   | 0.075   |                       |           |         | 0.99                | 0.97–1.01   | 0.36    |                       |           |         |
| Lymphocyte                  | 1.03                | 0.98–1.21   | 0.27    |                       |           |         | 0.91                | 0.72–1.14   | 0.41    |                       |           |         |
| Monocytes                   | 1.00                | 0.94–1.06   | 0.95    |                       |           |         | 1.07                | 0.84–1.43   | 0.61    |                       |           |         |
| Eosinophils                 | 2.43                | 0.94–15.0   | 0.073   |                       |           |         | 0.65                | 0.17–2.03   | 0.45    |                       |           |         |
| Platelets                   | 0.996               | 0.994–0.998 | <0.001  |                       |           |         | 0.998               | 0.996–1.00  | 0.051   |                       |           |         |
| Albumin                     | 0.95                | 0.91–0.99   | 0.011*  | 0.98                  | 0.94–1.03 | 0.402   | 0.92                | 0.89–0.96   | <0.001* | 0.91                  | 0.86–0.95 | <0.001  |
| Bilirubin                   | 1.02                | 1.01–1.05   | 0.002*  | 1.03                  | 1.01–1.06 | 0.013   | 1.03                | 1.01–1.05   | <0.001* | 1.03                  | 1.01–1.05 | 0.002   |
| CRP                         | 1.003               | 1.001–1.005 | <0.001  |                       |           |         | 1.00                | 0.998–1.002 | 0.947   |                       |           |         |

\* Variables associated with MAKE-30 in the univariable analysis and included in a backward multivariable model.  
Abbreviations: BMI, body mass index; eGFR, estimated glomerular filtration rate; CRP, C-reactive protein.

s-Table 2. Binomial logistic regression analysis of factors associated with MAKE-90 in COVID-19 vs non-COVID-19 groups

| Characteristic              | COVID-19 group      |                 |                          |                       |           |              | Non-COVID-19 group  |                 |                          |                       |           |              |
|-----------------------------|---------------------|-----------------|--------------------------|-----------------------|-----------|--------------|---------------------|-----------------|--------------------------|-----------------------|-----------|--------------|
|                             | Univariate Analysis |                 |                          | Multivariate analysis |           |              | Univariate Analysis |                 |                          | Multivariate analysis |           |              |
|                             | OR                  | 95% CI          | p-value                  | OR                    | 95% CI    | p-value      | OR                  | 95% CI          | p-value                  | OR                    | 95% CI    | p-value      |
| Age                         | 1.03                | 1.02–1.05       | <0.001 <sup>*</sup>      | 1.01                  | 1.01–1.05 | <b>0.006</b> | 0.99                | 0.98–1.01       | 0.47                     |                       |           |              |
| Male                        | 1.65                | 1.10–2.52       | <b>0.016<sup>*</sup></b> | 1.63                  | 1.00–2.72 | 0.054        | 0.85                | 0.50–1.44       | 0.55                     |                       |           |              |
| BMI                         | 1                   | 0.97–1.03       | 0.96                     |                       |           |              | 1                   | 0.97–1.04       | 0.82                     |                       |           |              |
| Ethnicity                   |                     |                 | <b>0.011<sup>*</sup></b> |                       |           |              |                     |                 | 0.17                     |                       |           |              |
| White                       | —                   | —               |                          |                       |           |              | —                   | —               |                          |                       |           |              |
| Asian / Asian British       | 0.76                | 0.48–1.19       |                          | 0.74                  | 0.40–1.12 | 0.274        | 2                   | 0.95–4.56       |                          |                       |           |              |
| Black / African / Caribbean | 2.04                | 0.96–4.47       |                          | 0.93                  | 0.95–5.18 | 0.882        | 2.33                | 0.79–8.50       |                          |                       |           |              |
| Other                       | 0.57                | 0.34–0.95       |                          | 0.44                  | 0.32–0.99 | 0.010        | 1.19                | 0.28–5.95       |                          |                       |           |              |
| Hypertension                | 2.02                | 1.36–3.00       | <0.001 <sup>*</sup>      | 1.11                  | 0.76–1.95 | 0.695        | 1.2                 | 0.67–2.18       | 0.54                     |                       |           |              |
| Diabetes mellitus           | 1.74                | 1.17–2.59       | <b>0.006<sup>*</sup></b> | 1.89                  | 1.25–3.24 | <b>0.013</b> | 1.07                | 0.56–2.07       | 0.84                     |                       |           |              |
| Obesity                     | 0.83                | 0.57–1.21       | 0.34                     |                       |           |              | 1.31                | 0.75–2.30       | 0.34                     |                       |           |              |
| Asthma                      | 0.83                | 0.46–1.44       | 0.51                     |                       |           |              | 0.96                | 0.36–2.70       | 0.94                     |                       |           |              |
| Ischemic heart disease      | 2.01                | 1.04–3.92       | <b>0.039<sup>*</sup></b> | 0.85                  | 0.46–2.11 | 0.698        | 1.47                | 0.70–3.25       | 0.31                     |                       |           |              |
| Cancer                      | 0.87                | 0.32–2.16       | 0.76                     |                       |           |              | 1.63                | 0.84–3.31       | 0.15                     |                       |           |              |
| eGFR                        | 0.95                | 0.94–0.96       | <0.001 <sup>*</sup>      | 0.95                  | 0.94–0.96 | <0.001       | 0.97                | 0.96–0.98       | <0.001 <sup>*</sup>      | 0.97                  | 0.96–0.98 | <0.001       |
| White cell count            | 1.01                | 0.99–1.03       | 0.48                     |                       |           |              | 0.97                | 0.94–1.00       | <b>0.046<sup>*</sup></b> | 0.98                  | 0.95–1.01 | 0.249        |
| Neutrophils                 | 1.03                | 1.00–1.07       | 0.09                     |                       |           |              | 0.99                | 0.97–1.01       | 0.29                     |                       |           |              |
| Lymphocyte                  | 1.03                | 0.98–1.20       | 0.29                     |                       |           |              | 0.92                | 0.73–1.17       | 0.5                      |                       |           |              |
| Monocytes                   | 1.00                | 0.94–1.06       | 0.97                     |                       |           |              | 1.06                | 0.83–1.42       | 0.67                     |                       |           |              |
| Eosinophils                 | 2.59                | 0.95–16.5       | 0.067                    |                       |           |              | 0.6                 | 0.16–1.89       | 0.38                     |                       |           |              |
| Platelets                   | 0.99<br>6           | 0.994–<br>0.998 | <0.001                   |                       |           |              | 0.998               | 0.997–<br>1.00  | 0.087                    |                       |           |              |
| Albumin                     | 0.95                | 0.91–0.99       | <b>0.011<sup>*</sup></b> | 0.98                  | 0.93–1.03 | 0.365        | 0.92                | 0.88–0.95       | <0.001 <sup>*</sup>      | 0.90                  | 0.85–0.94 | <0.001       |
| Bilirubin                   | 1.02                | 1.01–1.05       | <b>0.003<sup>*</sup></b> | 1.03                  | 1.01–1.06 | <b>0.018</b> | 1.03                | 1.01–1.05       | <0.001 <sup>*</sup>      | 1.03                  | 1.01–1.05 | <b>0.007</b> |
| CRP                         | 1.00<br>3           | 1.001–<br>1.005 | <0.001                   |                       |           |              | 0.999               | 0.997–<br>1.001 | 0.826                    |                       |           |              |

<sup>\*</sup> Variables associated with MAKE-90 in the univariable analysis and included in a backward multivariable model.  
**Abbreviations:** BMI, body mass index; eGFR, estimated glomerular filtration rate; CRP, C-reactive protein.

s-Table 3. Binomial logistic regression analysis of factors associated with MAKE-180 in COVID-19 vs non-COVID-19 groups

| Characteristic              | COVID-19 group      |             |                          |                       |           |              | Non-COVID-19 group  |             |                          |                       |           |              |
|-----------------------------|---------------------|-------------|--------------------------|-----------------------|-----------|--------------|---------------------|-------------|--------------------------|-----------------------|-----------|--------------|
|                             | Univariate Analysis |             |                          | Multivariate analysis |           |              | Univariate Analysis |             |                          | Multivariate analysis |           |              |
|                             | OR                  | 95% CI      | p-value                  | OR                    | 95% CI    | p-value      | OR                  | 95% CI      | p-value                  | OR                    | 95% CI    | p-value      |
| Age                         | 1.04                | 1.02–1.06   | <0.001 <sup>*</sup>      | 1.04                  | 1.01–1.06 | <b>0.001</b> | 1                   | 0.98–1.02   | >0.99                    |                       |           |              |
| Male                        | 1.65                | 1.10–2.50   | <b>0.016<sup>*</sup></b> | 1.64                  | 1.00–2.74 | 0.051        | 0.96                | 0.56–1.64   | 0.89                     |                       |           |              |
| BMI                         | 1                   | 0.97–1.02   | 0.87                     |                       |           |              | 1                   | 0.97–1.04   | 0.82                     |                       |           |              |
| Ethnicity                   |                     |             | <b>0.026<sup>*</sup></b> |                       |           |              |                     |             | 0.38                     |                       |           |              |
| White                       | —                   | —           |                          | —                     | —         |              | —                   | —           |                          |                       |           |              |
| Asian / Asian British       | 0.79                | 0.50–1.23   |                          | 0.79                  | 0.46–1.36 | 0.403        | 1.71                | 0.81–3.90   |                          |                       |           |              |
| Black / African / Caribbean | 2.04                | 0.96–4.47   |                          | 0.90                  | 0.34–2.40 | 0.837        | 1.99                | 0.67–7.28   |                          |                       |           |              |
| Other                       | 0.63                | 0.37–1.04   |                          | 0.50                  | 0.27–0.97 | <b>0.029</b> | 1.02                | 0.24–5.09   |                          |                       |           |              |
| Hypertension                | 1.93                | 1.30–2.87   | <b>0.001<sup>*</sup></b> | 1.01                  | 0.60–1.68 | 0.968        | 1.23                | 0.68–2.26   | 0.5                      |                       |           |              |
| Diabetes mellitus           | 1.74                | 1.17–2.58   | <b>0.006<sup>*</sup></b> | 1.90                  | 1.15–3.14 | <b>0.013</b> | 1.03                | 0.54–2.01   | 0.93                     |                       |           |              |
| Obesity                     | 0.82                | 0.56–1.19   | 0.29                     |                       |           |              | 1.41                | 0.80–2.52   | 0.23                     |                       |           |              |
| Asthma                      | 0.87                | 0.49–1.51   | 0.63                     |                       |           |              | 1.09                | 0.41–3.24   | 0.86                     |                       |           |              |
| Ischemic heart disease      | 1.95                | 1.01–3.80   | <b>0.048<sup>*</sup></b> | 0.79                  | 0.34–1.83 | 0.593        | 1.28                | 0.61–2.83   | 0.52                     |                       |           |              |
| Cancer                      | 0.84                | 0.31–2.10   | 0.72                     |                       |           |              | 1.59                | 0.81–3.29   | 0.18                     |                       |           |              |
| eGFR                        | 0.95                | 0.93–0.96   | <0.001 <sup>*</sup>      | 0.95                  | 0.94–0.96 | <0.001       | 0.97                | 0.96–0.98   | <0.001 <sup>*</sup>      | 0.97                  | 0.95–0.98 | <0.001       |
| White cell count            | 1.01                | 0.99–1.03   | 0.54                     |                       |           |              | 0.97                | 0.94–1.00   | <b>0.042<sup>*</sup></b> | 0.98                  | 0.95–1.01 | 0.232        |
| Neutrophils                 | 1.03                | 0.99–1.07   | 0.12                     |                       |           |              | 0.99                | 0.96–1.00   | 0.21                     |                       |           |              |
| Lymphocyte                  | 1.03                | 0.98–1.18   | 0.31                     |                       |           |              | 0.9                 | 0.71–1.14   | 0.39                     |                       |           |              |
| Monocytes                   | 1.00                | 0.94–1.05   | >0.99                    |                       |           |              | 1.03                | 0.81–1.38   | 0.81                     |                       |           |              |
| Eosinophils                 | 2.39                | 0.93–14.8   | 0.078                    |                       |           |              | 0.51                | 0.13–1.60   | 0.25                     |                       |           |              |
| Platelets                   | 0.996               | 0.994–0.998 | <0.001                   |                       |           |              | 0.998               | 0.997–1.00  | 0.078                    |                       |           |              |
| Albumin                     | 0.95                | 0.92–0.99   | <b>0.013<sup>*</sup></b> | 0.98                  | 0.94–1.03 | 0.452        | 0.91                | 0.88–0.95   | <0.001 <sup>*</sup>      | 0.89                  | 0.85–0.94 | <0.001       |
| Bilirubin                   | 1.02                | 1.01–1.05   | <b>0.003<sup>*</sup></b> | 1.03                  | 1.01–1.06 | <b>0.016</b> | 1.03                | 1.01–1.05   | <0.001 <sup>*</sup>      | 1.03                  | 1.01–1.05 | <b>0.007</b> |
| CRP                         | 1.003               | 1.001–1.004 | 0.001                    |                       |           |              | 0.999               | 0.997–1.001 | 0.53                     |                       |           |              |

\* Variables associated with MAKE-180 in the univariable analysis and included in a backward multivariable model.  
**Abbreviations:** BMI, body mass index; eGFR, estimated glomerular filtration rate; CRP, C-reactive protein.



**s-Table 4. Comparisons between patients who received RRT and those who did not within 30 days in the COVID-19 group**

| Variables *                          | Overall<br>(N=458) | No RRT<br>(N=317) | RRT<br>(N=141) | P-value |
|--------------------------------------|--------------------|-------------------|----------------|---------|
| eGFR, ml/min per 1.73 m <sup>2</sup> | 84 [60-90]         | 90.0 [81-90]      | 54.0 [28-74]   | <0.001  |
| Mortality, (n, %)                    | 138 (30%)          | 65 (21%)          | 73 (52%)       | <0.001  |

Data is presented as median (IQR), unless otherwise stated.  
\* Data collected by 365 days from ICU admission.  
**Abbreviations:** eGFR, estimated glomerular filtration rate, RRT, renal replacement therapy, CI, confidence interval.

**s-Table 5. Comparisons between patients who received RRT and those who did not within 30 days in the non-COVID-19 group**

| Variables *                          | Overall<br>(N=250) | No RRT<br>(N=138) | RRT<br>(N=112) | P-value |
|--------------------------------------|--------------------|-------------------|----------------|---------|
| eGFR, ml/min per 1.73 m <sup>2</sup> | 63 [39-88]         | 79.0 [58-90]      | 36.0 [26-51]   | <0.001  |
| Mortality, (n, %)                    | 128 (51%)          | 54 (39%)          | 74 (66%)       | <0.001  |

Data is presented as median (IQR), unless otherwise stated.  
\* Data collected by 365 days from ICU admission.  
**Abbreviations:** eGFR, estimated glomerular filtration rate, RRT, renal replacement therapy, CI, confidence interval.

**s-Table 6. Renal recovery of AKI patients at hospital discharge in both group**

|                           | Overall<br>(N=398) | COVID-AKI<br>(N=222) | Non-COVID AKI<br>(N=176) | P-value * |
|---------------------------|--------------------|----------------------|--------------------------|-----------|
| <b>Discharge 30 days</b>  |                    |                      |                          |           |
| Incomplete renal recovery | 26 (6.5%)          | 17 (7.7%)            | 9 (5.1%)                 | 1         |
| Complete renal recovery   | 71 (17.8%)         | 47 (21.2%)           | 24 (13.6%)               |           |
| <b>Discharge 90 days</b>  |                    |                      |                          |           |
| Incomplete renal recovery | 61 (15.3%)         | 34 (15.3%)           | 27 (15.3%)               | 0.195     |
| Complete renal recovery   | 129 (32.4%)        | 86 (38.7%)           | 43 (24.4%)               |           |
| <b>Discharge 180 days</b> |                    |                      |                          |           |
| Incomplete renal recovery | 62 (15.6%)         | 35 (15.8%)           | 27 (15.3%)               | 0.208     |
| Complete renal recovery   | 136 (34.2%)        | 91 (41.0%)           | 45 (25.6%)               |           |

Data is presented as median (IQR), unless otherwise stated.  
\* p-values from the chi-squared test represent the differences between COVID-AKI vs non-COVID-AKI groups.  
**Abbreviations:** AKI, acute kidney injury.

**s-Table 7. Incidence of AKI and MAKE-365 across ARDS severity in COVID-19 group**

|                      | Overall<br>(N=458) | Mild<br>(N=39) | Moderate<br>(N=209) | Severe<br>(N=210) | P-value* |
|----------------------|--------------------|----------------|---------------------|-------------------|----------|
| <b>AKI Incidence</b> | 222 (49%)          | 15 (39%)       | 108 (52%)           | 99 (47%)          | 0.276    |
| <b>MAKE-365</b>      | 178 (39%)          | 10 (26%)       | 87 (42%)            | 81 (39%)          | 0.17     |

Data presented as frequencies with percentages.  
\* p-values from Kruskal-Wallis test represent the differences in the incidence of AKI and MAKE-365 across ARDS severity in COVID-19 group.  
**Abbreviations:** AKI, acute kidney injury, MAKE, major adverse kidney events.

**s-Table 8. Incidence of AKI and MAKE-365 across ARDS Severity in non-COVID-19 group**

|                      | Overall<br>(N=250) | Mild<br>(N=41) | Moderate<br>(N=98) | Severe<br>(N=111) | P-value |
|----------------------|--------------------|----------------|--------------------|-------------------|---------|
| <b>AKI Incidence</b> | 176 (70%)          | 23 (56%)       | 67 (68%)           | 86 (78%)          | 0.032   |
| <b>MAKE-365</b>      | 166 (66%)          | 22 (54%)       | 61 (62%)           | 83 (75%)          | 0.027   |

Data presented as frequencies with percentages.  
\* p-values from Kruskal-Wallis test represent the differences in the incidence of AKI and MAKE-365 across ARDS severity in non-COVID-19 group.  
**Abbreviations:** AKI, acute kidney injury, MAKE, major adverse kidney events.

**s-Table 9. Incidence of MAKE among ARDS patients with only respiratory infection**

|                 | Overall<br>(N=658) | COVID<br>(N=458) | Non-COVID<br>(N=200) | P-value |
|-----------------|--------------------|------------------|----------------------|---------|
| <b>MAKE-30</b>  | 280 (42.6%)        | 172 (37.6%)      | 108 (54.0%)          | <0.001  |
| <b>MAKE-90</b>  | 288 (43.8%)        | 175 (38.2%)      | 113 (56.5%)          | <0.001  |
| <b>MAKE-180</b> | 297 (45.1%)        | 178 (38.9%)      | 119 (59.5%)          | <0.001  |
| <b>MAKE-365</b> | 300 (45.6%)        | 178 (38.9%)      | 122 (61.0%)          | <0.001  |

Data presented as frequencies with percentages.  
\* p-values from chi-squared test represent the differences of incidence of MAKEs outcome among ARDS patients with mainly respiratory infection in COVID-19 vs non-COVID-19 groups.  
**Abbreviations:** MAKE, major adverse kidney events.
